# Supplementary material for: Transcriptional and Chromatin Accessibility Profiling of Neural Stem Cells Differentiating into Astrocytes Reveal Dynamic Signatures Affected under Inflammatory Conditions
Source: MDPI journal article supplement (doi:10.3390/cells12060948), 2023-03-21

# Supplementary Figure S1

**A**

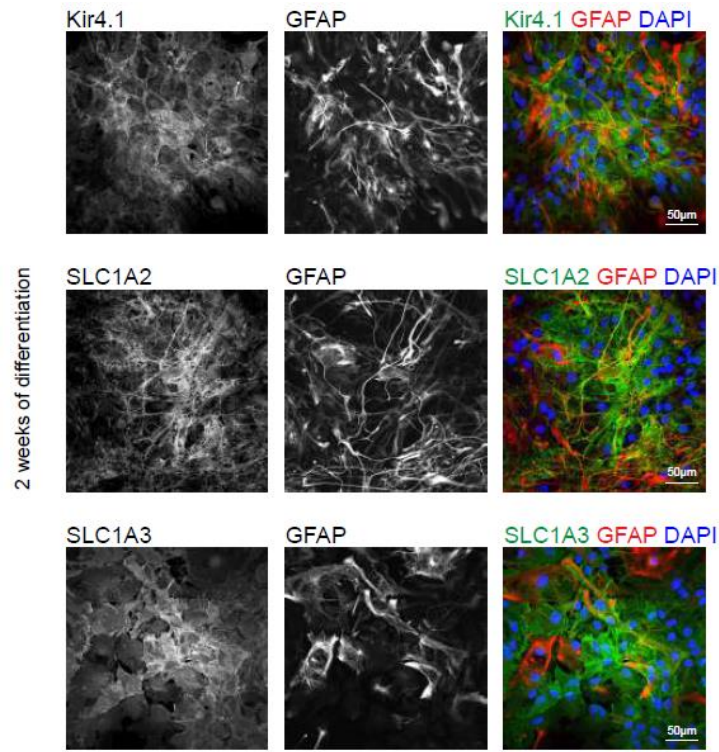

**B**

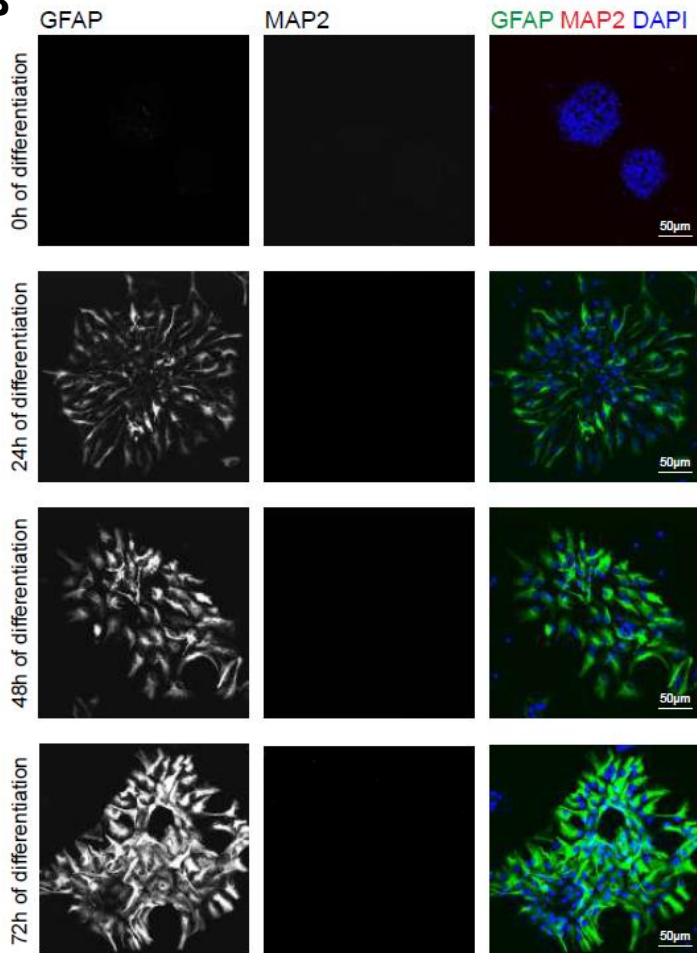

**C**

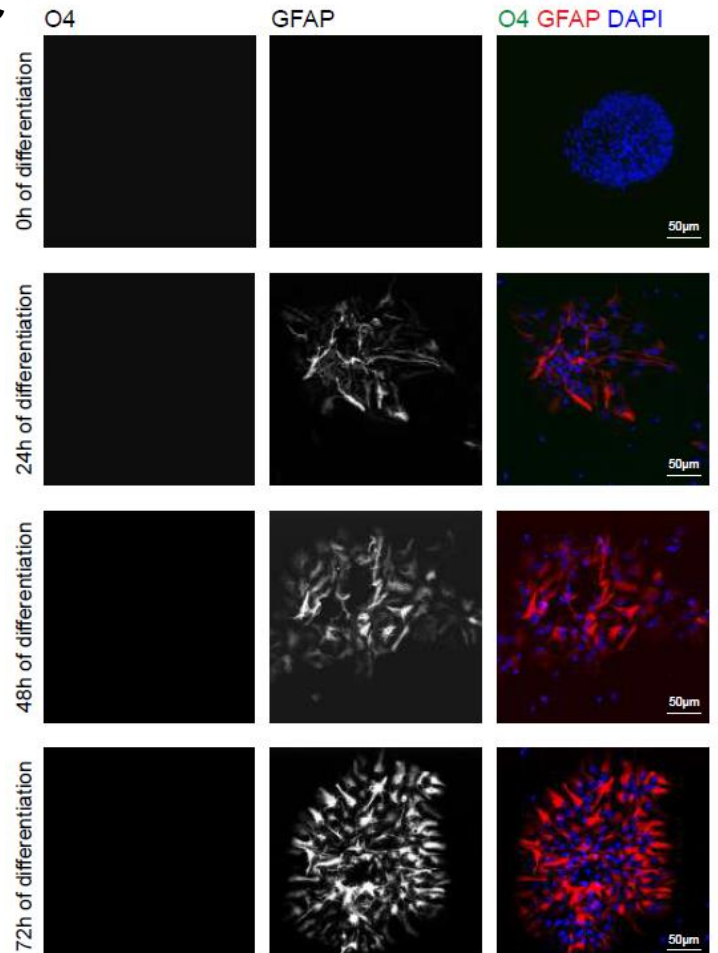

**D**

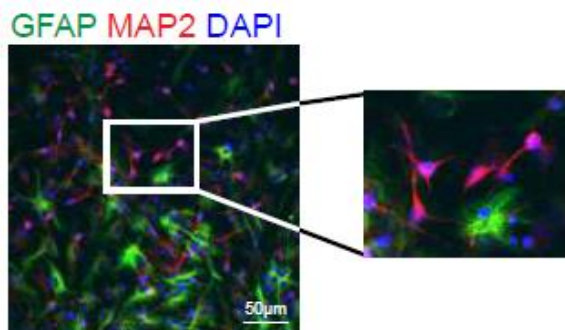

**E**

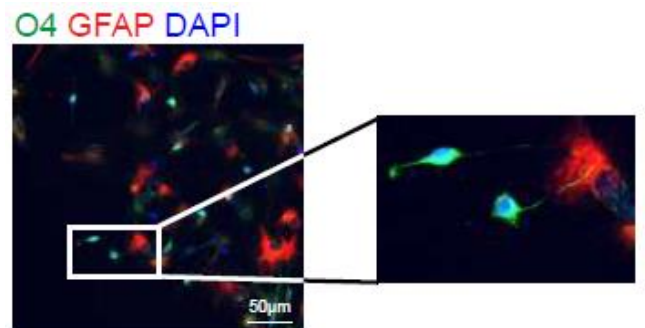

## Supplementary Figure S2

**A**

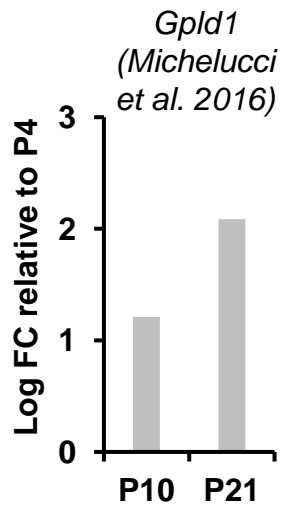

**B**

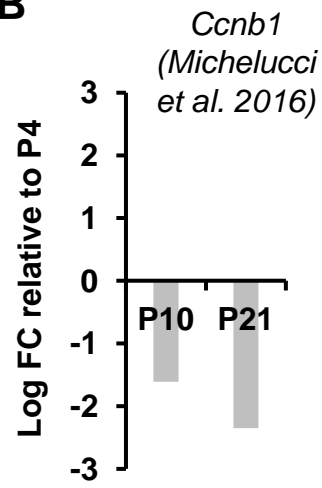

**C**

**GLAST/SLC1A3<sup>+</sup> cells**

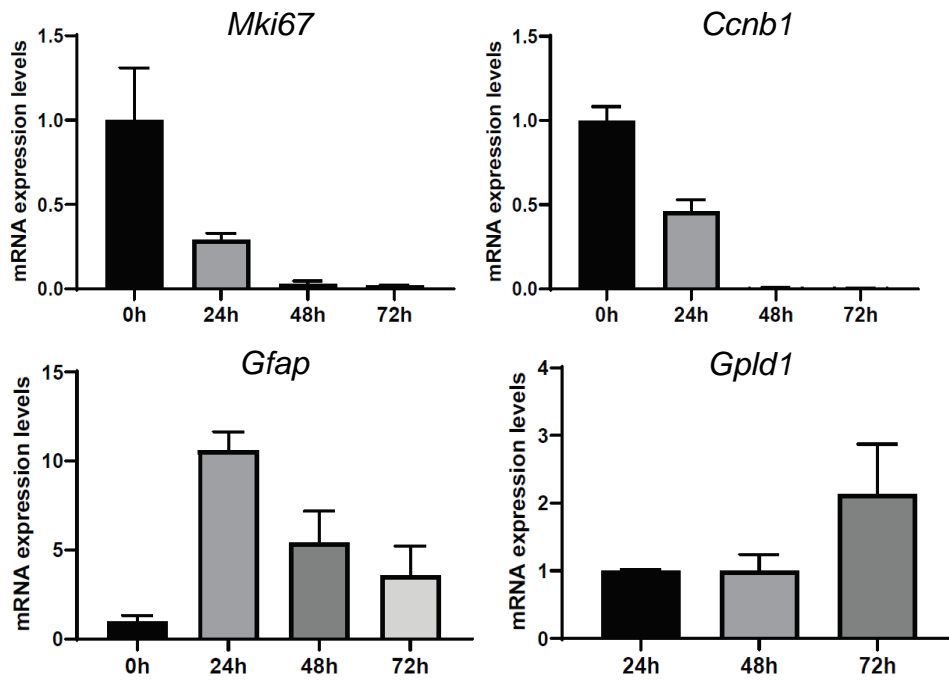

**D**

**GLAST/SLC1A3<sup>-</sup> cells**

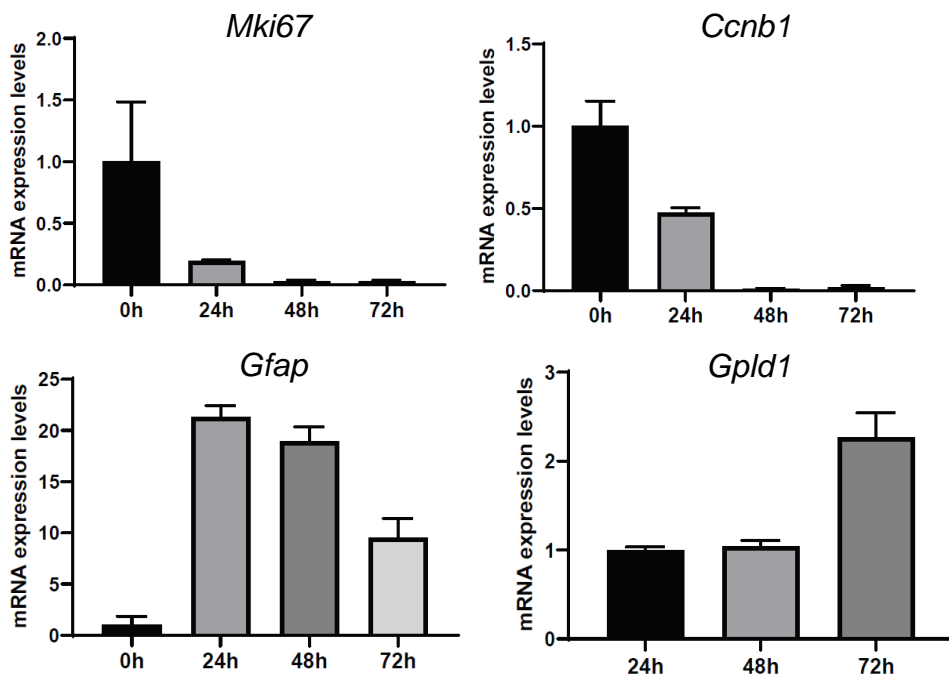

# Supplementary Figure S3

## A Developing & differentiated astrocytes

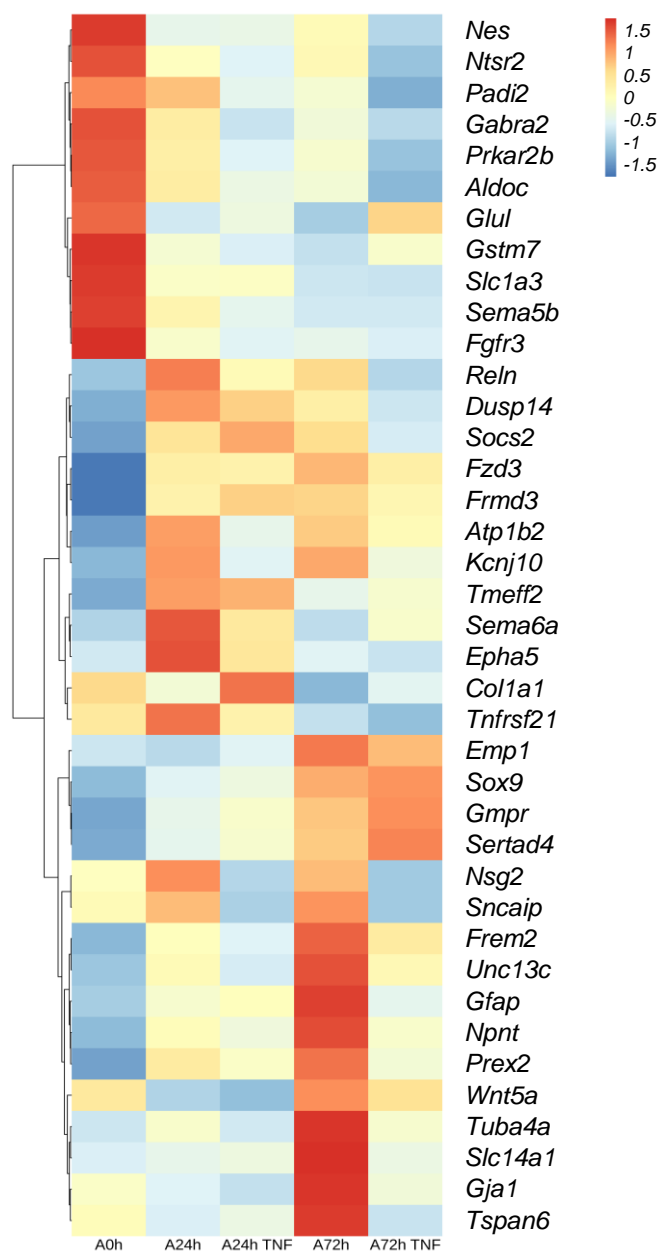

## B Reactive astrocytes

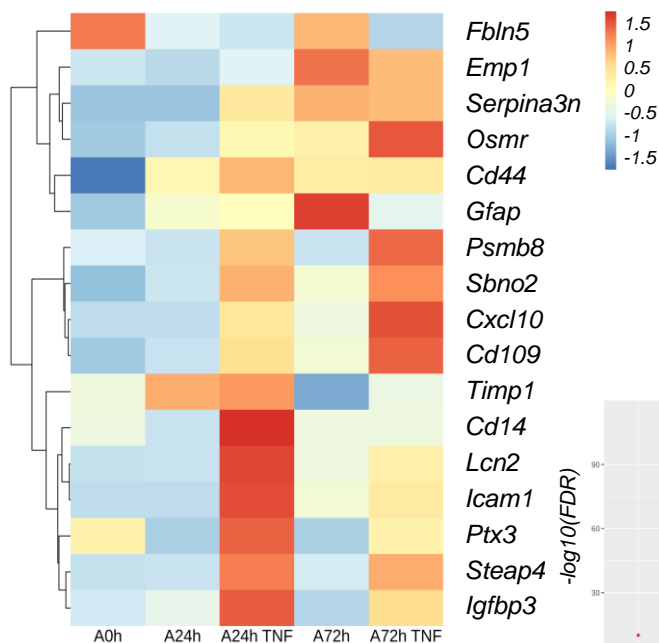

## C A1 astrocytes (Liddel et al. 2017)

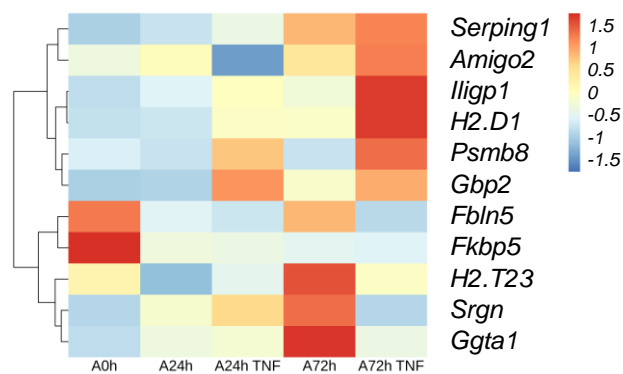

## D A2 astrocytes (Liddel et al. 2017)

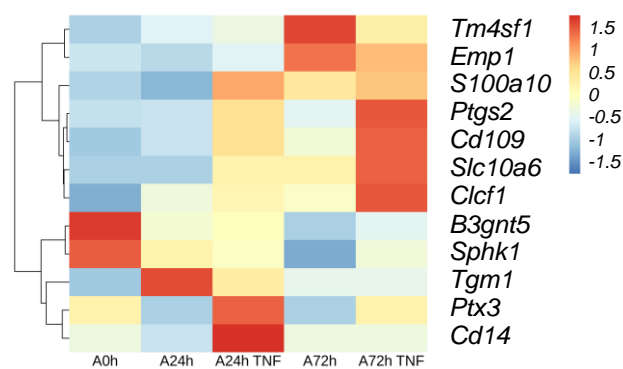

## E Glycogen activity

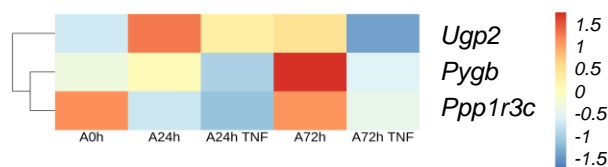

## F Glucose metabolism

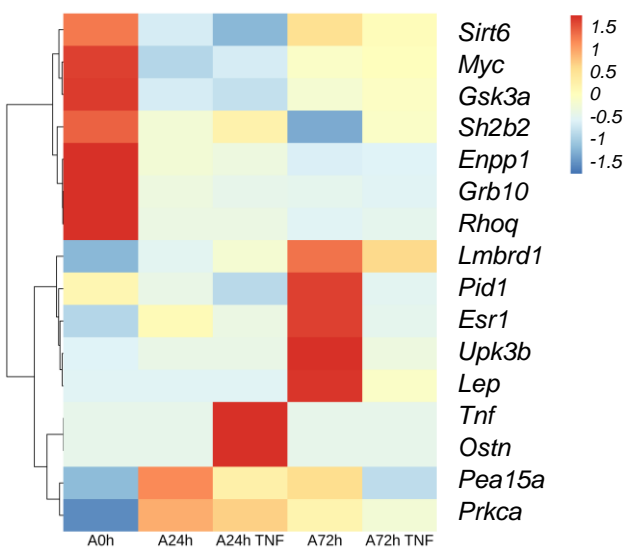

## G

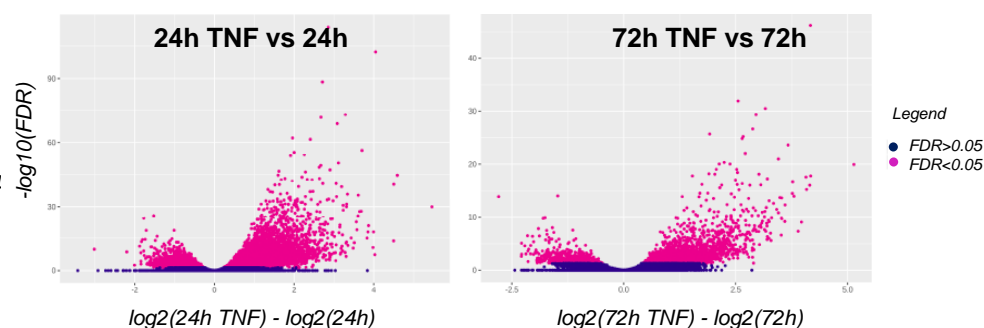

Supplementary Figure S4

A

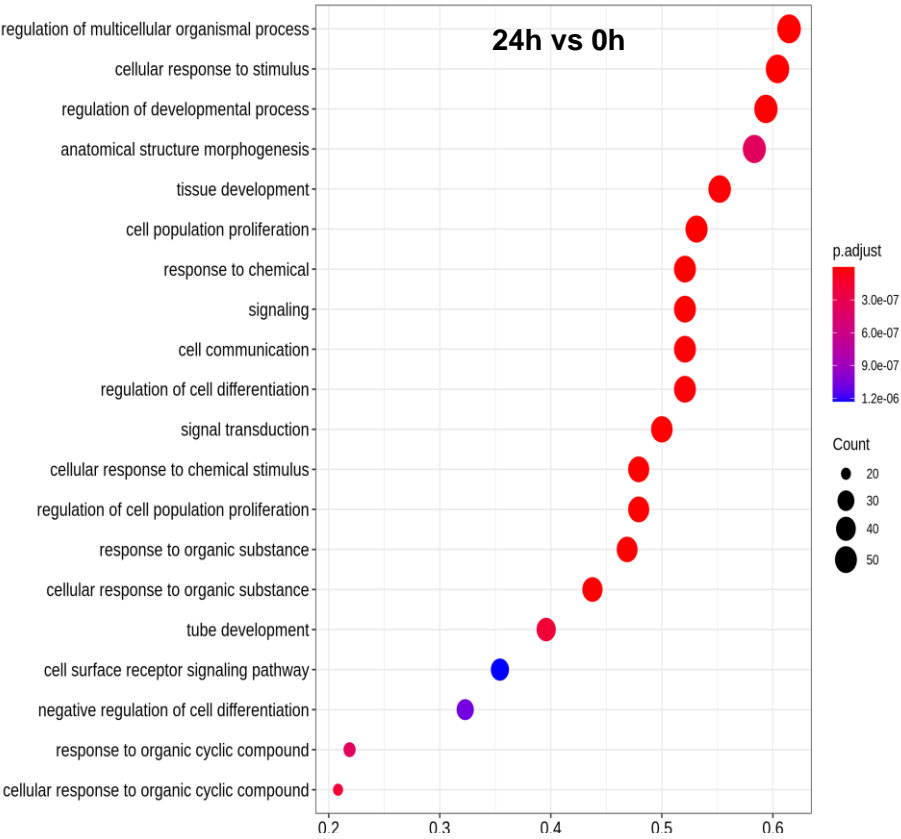

B

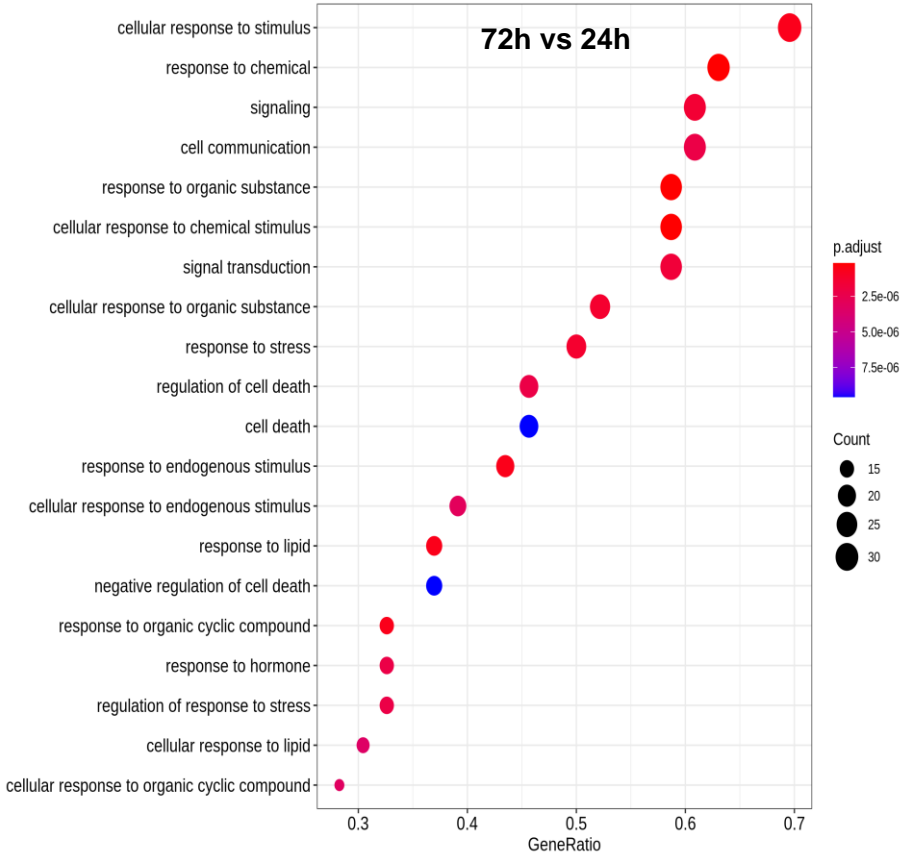

C

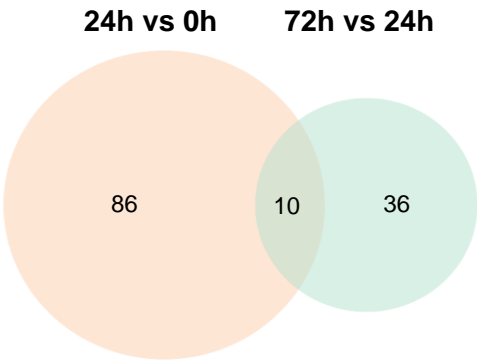

Supplementary Figure S5

A

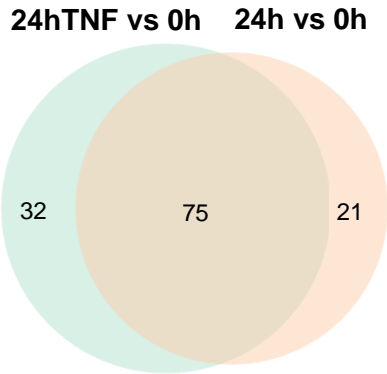

B

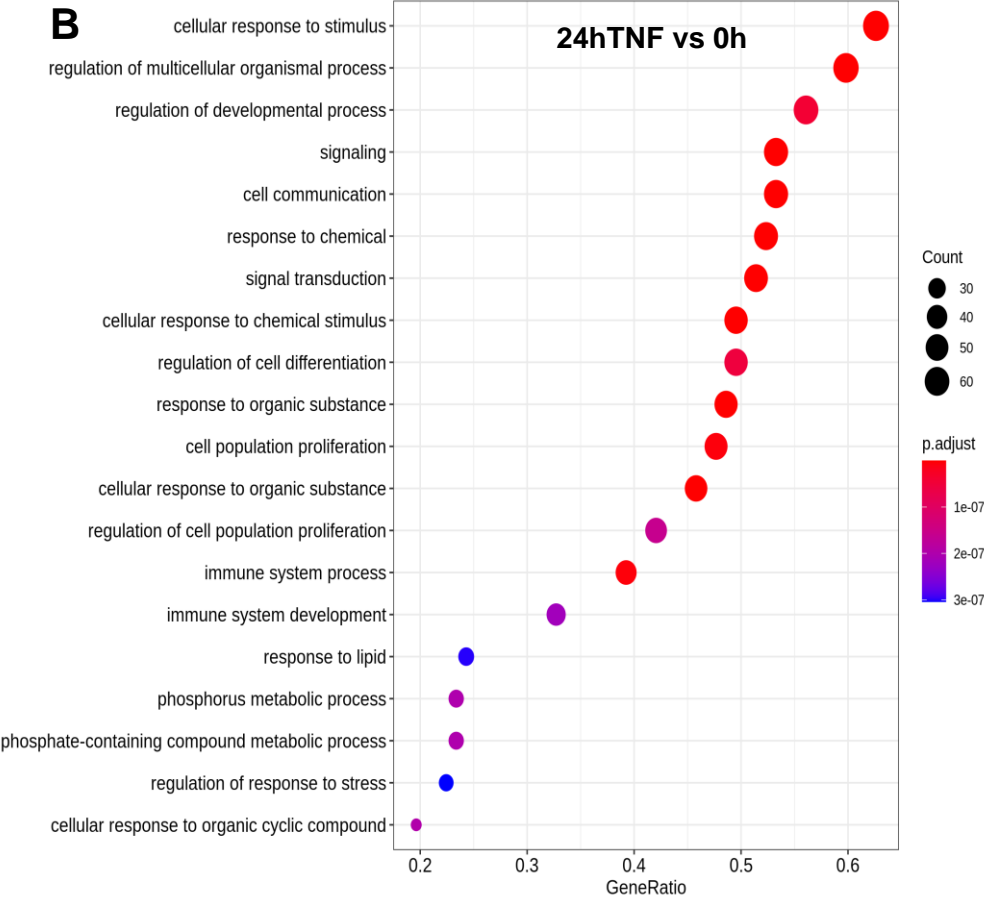

C

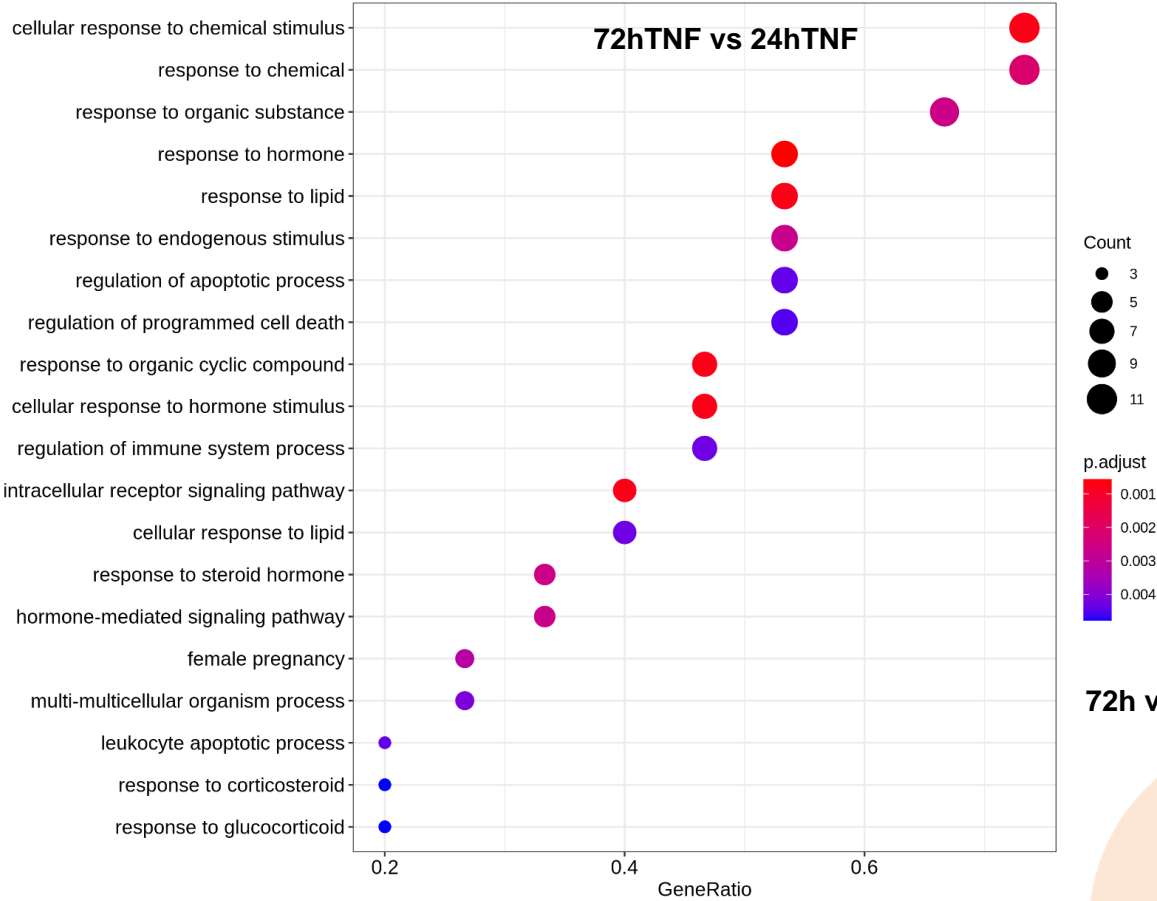

D

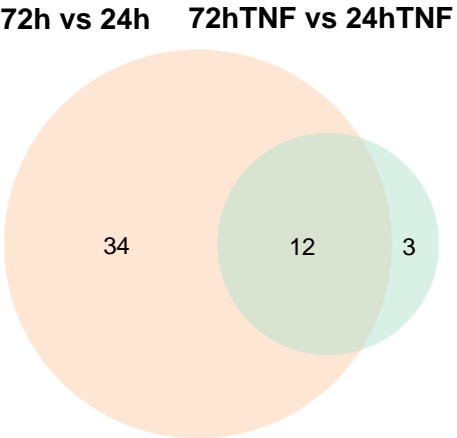

Supplement: s1 [file s1]
